# Supplementary material for: Alternative Method for Primary Nasal Epithelial Cell Culture Using Intranasal Brushing and Feasibility for the Study of Epithelial Functions in Allergic Rhinitis
Source: PubMed Central journal article supplement — Allergy Asthma Immunol Res. 2015 Sep 16;8(1):69–78. doi: 10.4168/aair.2016.8.1.69 (PMC4695411; doi:10.4168/aair.2016.8.1.69), 2015-09-16
Supplement: aair-8-69-s001.pdf [file aair-8-69-s001.pdf]

**Supplement Table.** Demographics of healthy volunteers (N=8) and allergic rhinitis patients (N=8)

|                            | Sex (M/F) | Age (year) | Diagnostic methods       | Positive allergens |
|----------------------------|-----------|------------|--------------------------|--------------------|
| Healthy volunteers         | M         | 24         | Allergic skin test       | None               |
|                            | M         | 22         | Allergic skin test       | None               |
|                            | F         | 36         | Allergic skin test       | None               |
|                            | F         | 25         | Allergic skin test       | None               |
|                            | F         | 24         | Allergic skin test       | None               |
|                            | M         | 31         | Allergic skin test       | None               |
|                            | M         | 33         | Allergic skin test       | None               |
|                            | M         | 39         | Allergic skin test       | None               |
| Allergic rhinitis patients | M         | 25         | Allergic skin test, MAST | HDM                |
|                            | M         | 26         | Allergic skin test, MAST | HDM                |
|                            | M         | 38         | Allergic skin test, MAST | Pollen             |
|                            | M         | 37         | Allergic skin test, MAST | HDM,Cat            |
|                            | F         | 22         | Allergic skin test, MAST | HDM                |
|                            | F         | 21         | Allergic skin test, MAST | HDM                |
|                            | M         | 28         | Allergic skin test, MAST | HDM, Alternaria    |
|                            | M         | 19         | Allergic skin test, MAST | HDM, Egg, Ragweed  |

MAST, multi allergen simultaneous test; HDM, house dust mite.
